# Supplementary material for: A reaction-type receptor for the multi-feature detection of Hg2+ in water and living cells
Source: Royal Society of Chemistry journal article supplement (doi:10.1039/d0nj01995j), 2020-01-01
Supplement: d0nj01995j1.pdf [file d0nj01995j1.pdf]

## Supporting Information

for

### A reaction-type receptor for the multi-feature detection of $\text{Hg}^{2+}$ in water and living cells †

Mei Zhao,<sup>‡</sup> Guang-Kui Shao,<sup>‡</sup> Yu-Shuang Guo, Yan-Ling Tang, Jian-Biao Liu\*, Dian-Shun Guo\*

*College of Chemistry, Chemical Engineering and Materials Science, Collaborative Innovation Center of Functionalized Probes for Chemical Imaging in Universities of Shandong, Shandong Normal University, Jinan 250014, P. R. China.*

#### Corresponding Authors

\* Emails: [chdsguo@sdu.edu.cn](mailto:chdsguo@sdu.edu.cn) (D.-S. G.); [jianbiaoliu.thu@gmail.com](mailto:jianbiaoliu.thu@gmail.com) (J.-B. L)

## Contents

- Fig. S1.** FT-IR spectrum of **FR-R1**
- Fig. S2.**  $^1\text{H}$  NMR spectrum of **FR-R1**
- Fig. S3.**  $^{13}\text{C}$  NMR spectrum of **FR-R1**
- Fig. S4.** HR-MS spectrum of **FR-R1**
- Table S1.** Crystallographic and refinement data of **FR-R1**
- Table S2.** Selected bond lengths and angles for **FR-R1**
- Table S3.** Hydrogen bond geometry for **FR-R1**
- Fig. S5.** Hirshfeld surfaces of **FR-R1** in different orientations
- Fig. S6.** Fingerprint plots of **FR-R1**
- Fig. S7.** Fingerprint plots of **FR-R1** resolved into the indicated intermolecular contacts
- Fig. S8.** Distribution of intermolecular contacts from Hirshfeld surface analysis for **FR-R1**
- Fig. S9.** UV-vis spectrum of **FR-R1**
- Table S4.** UV-vis absorption of **FR-R1** at 569 nm in different solvents
- Fig. S10.** UV-vis spectra of **FR-R1** in  $\text{H}_2\text{O}/\text{THF}$  with various ions
- Fig. S11.** Color changes of **FR-R1** in  $\text{H}_2\text{O}/\text{THF}$  with different metal ions under visible light
- Fig. S12.** Effects of EDTA on UV-vis spectra of **FR-R1** in  $\text{H}_2\text{O}/\text{THF}$  with  $\text{Hg}^{2+}$  or  $\text{Cu}^{2+}$
- Fig. S13.** Fluorescent spectrum of **FR-R1** in  $\text{H}_2\text{O}/\text{THF}$
- Fig. S14.** Time response of **FR-R1** in  $\text{H}_2\text{O}/\text{THF}$  to  $\text{Hg}^{2+}$
- Fig. S15.** Fluorescent spectra of **FR-R1** with  $\text{Hg}^{2+}$  affected by  $\text{Cu}^{2+}$  or  $\text{Cu}^{2+}$  plus EDTA
- Fig. S16.** Fluorescent spectra of **FR-R1** with  $\text{Hg}^{2+}$  in the mixture of all interfering metal ions except  $\text{Cu}^{2+}$  at the same concentration
- Fig. S17.** Fluorescent spectra of **FR-R1** with  $\text{Hg}^{2+}$  in the mixture of all interfering metal ions at the same concentration
- Fig. S18.** Fluorescent spectra of **FR-R1** with  $\text{Hg}^{2+}$  obtained during the titration of  $\text{Cu}^{2+}$  (0 to 5.0 equiv.)
- Fig. S19.** Fluorescent intensity changes of **FR-R1** and [**FR-R1** +  $\text{Hg}^{2+}$ ] in various pH values
- Table S5.** CV data of **FR-R1** in the absence and presence of  $\text{Hg}^{2+}$
- Fig. S20.** CV assays of **FR-R1** in  $\text{CH}_2\text{Cl}_2/\text{MeCN}$  with  $\text{Hg}^{2+}$  (0 to 1.0 equiv.)
- Fig. S21.** DPV assays of **FR-R1** in  $\text{H}_2\text{O}/\text{THF}$  to  $\text{Cu}^{2+}$  (0 and 1.0 equiv.)
- Fig. S22.** DPV assays of **FR-R1** in  $\text{H}_2\text{O}/\text{THF}$  to  $\text{Hg}^{2+}$  and  $\text{Cu}^{2+}$  in the presence of EDTA
- Table S6.** Comparison of **FR-R1** with selected analogs with different functional groups
- Fig. S23.**  $^1\text{H}$  NMR spectra of **FR-R1** and **FR-RO** in  $\text{DMSO}-d_6$
- Table S7.** Cartesian coordinates of the structures of **FR-R1** and **FR-RO**
- Fig. S24.** The Mulliken charge values in **FR-R1** and **FR-RO**
- Fig. S25.** The cytotoxicity of **FR-R1** on HeLa cells

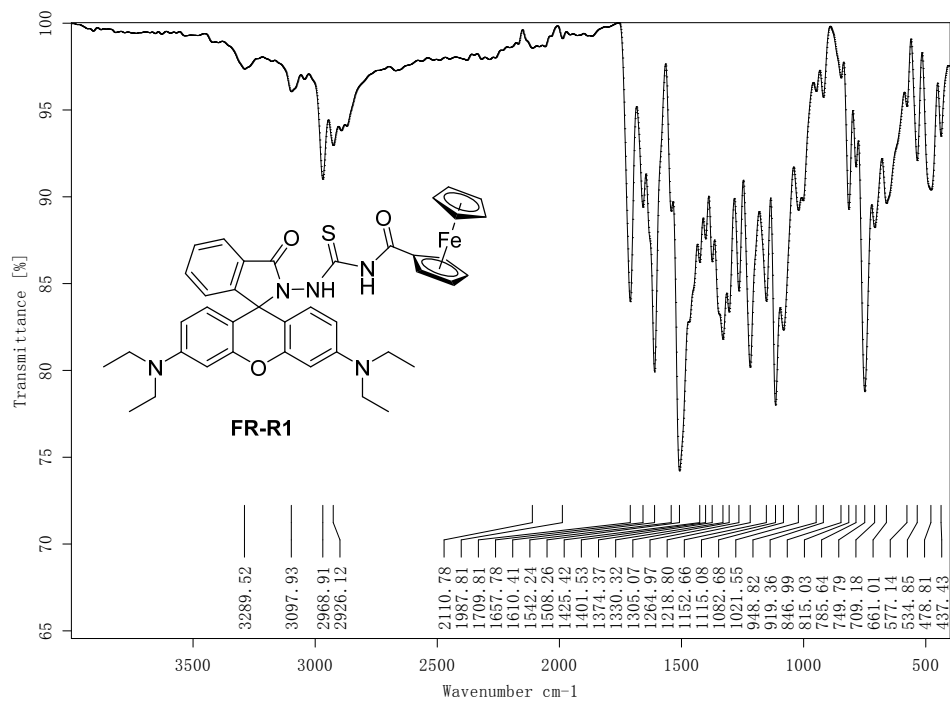

Fig. S1. FT-IR spectrum of FR-R1.

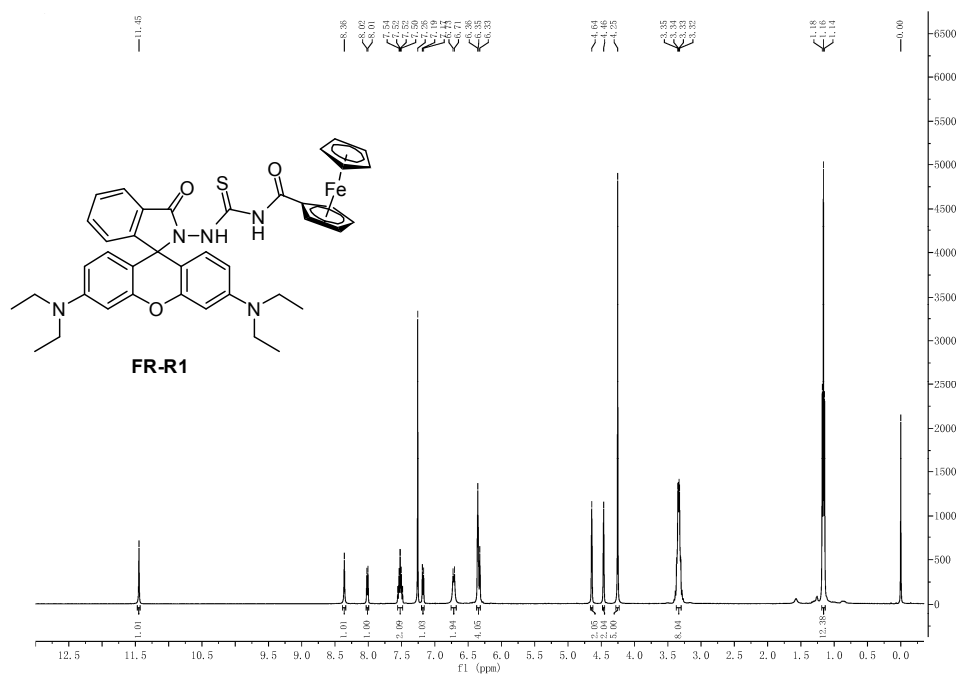

Fig. S2. <sup>1</sup>H NMR spectrum of FR-R1 in CDCl<sub>3</sub>.

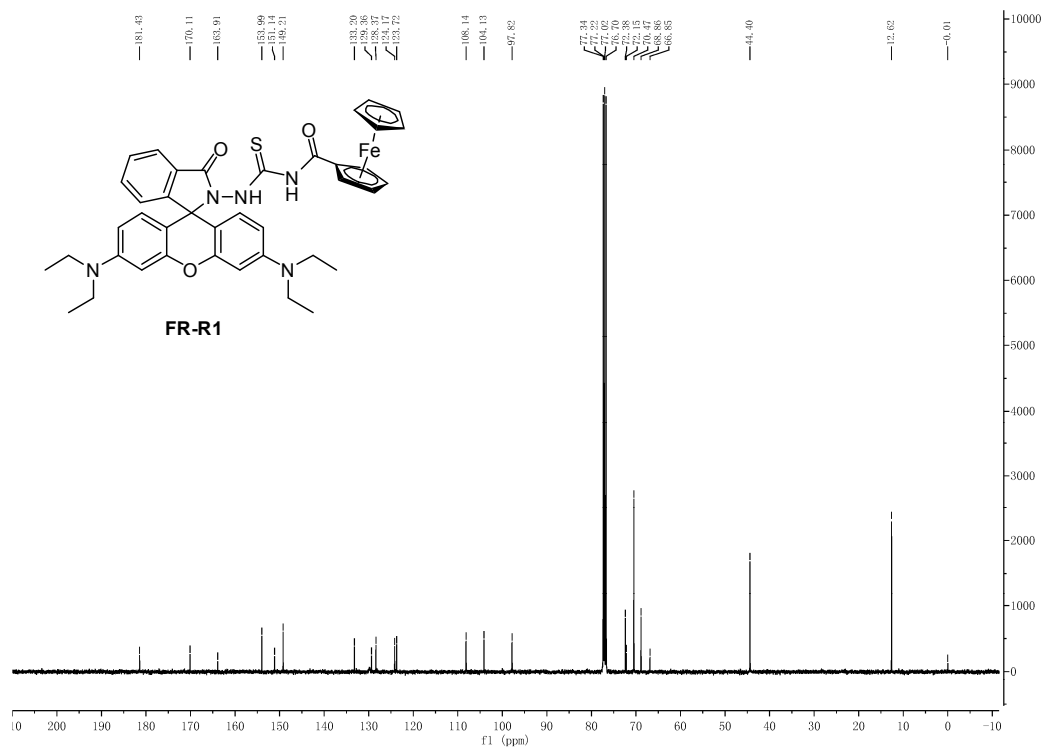

**Fig. S3.**  $^{13}\text{C}$  NMR spectrum of **FR-R1** in  $\text{CDCl}_3$ .

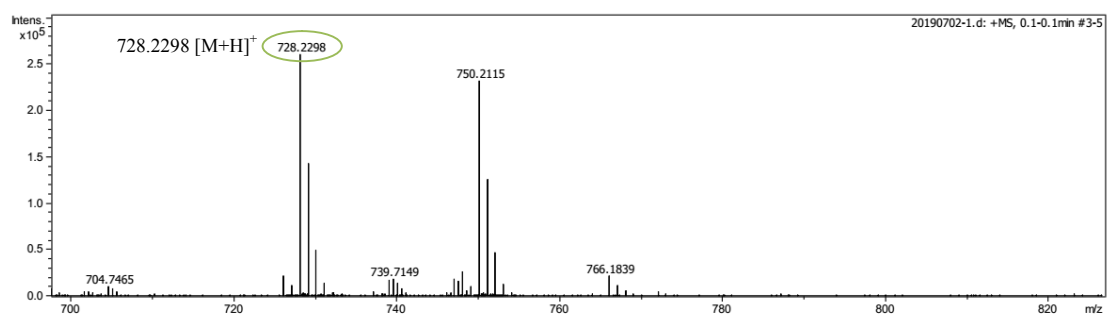

**Fig. S4.** HR-MS of **FR-R1**.

**Table S1.** Crystallographic and refinement data of **FR-R1**

|                                                     |                                                                                                                                    |
|-----------------------------------------------------|------------------------------------------------------------------------------------------------------------------------------------|
| Formula                                             | C <sub>40</sub> H <sub>40</sub> FeN <sub>5</sub> O <sub>3</sub> S·CHCl <sub>3</sub>                                                |
| <i>Mr</i>                                           | 846.05                                                                                                                             |
| Temperature                                         | 150.00(10) K                                                                                                                       |
| Wavelength                                          | 1.54184 Å                                                                                                                          |
| Crystal system                                      | Orthorhombic                                                                                                                       |
| Space group                                         | <i>Pca</i> 2 <sub>1</sub>                                                                                                          |
| Unit cell dimensions                                | <i>a</i> = 30.8908(12) Å $\alpha$ = 90.00°<br><i>b</i> = 9.6600(3) Å $\beta$ = 90.00°<br><i>c</i> = 12.8697(5) Å $\gamma$ = 90.00° |
| Volume                                              | 3840.4(2) Å <sup>3</sup>                                                                                                           |
| <i>Z</i>                                            | 4                                                                                                                                  |
| Density                                             | 1.463 mg/m <sup>3</sup>                                                                                                            |
| Absorption coefficient                              | 5.956 mm <sup>-1</sup>                                                                                                             |
| F(000)                                              | 1756                                                                                                                               |
| Crystal size                                        | 0.26 x 0.19 x 0.09 mm                                                                                                              |
| Theta range for data collection                     | 4.47 to 70.95°                                                                                                                     |
| Limiting indices                                    | -32 ≤ <i>h</i> ≤ 37, -11 ≤ <i>k</i> ≤ 8, -9 ≤ <i>l</i> ≤ 15                                                                        |
| Reflections collected / unique                      | 9435 / 4224 [ <i>R</i> (int) = 0.040]                                                                                              |
| Completeness to theta = 25.68                       | 99.8 %                                                                                                                             |
| Absorption correction                               | Muti-scan                                                                                                                          |
| Max. and min. transmission                          | 1.00000 and 0.43673                                                                                                                |
| Refinement method                                   | Full-matrix least-squares on <i>F</i> <sup>2</sup>                                                                                 |
| Data/ restraints /parameters                        | 4918/ 1 / 491                                                                                                                      |
| Goodness-of-fit on <i>F</i> <sup>2</sup>            | 1.029                                                                                                                              |
| Final <i>R</i> indices [ <i>I</i> > 2σ( <i>I</i> )] | <i>R</i> <sub>1</sub> = 0.0728, <i>wR</i> <sub>2</sub> = 0.2047                                                                    |
| <i>R</i> indices (all data)                         | <i>R</i> <sub>1</sub> = 0.0864, <i>wR</i> <sub>2</sub> = 0.1875                                                                    |
| Largest diff. peak and hole                         | 0.787 and -0.867 e. Å <sup>-3</sup>                                                                                                |

**Table S2.** Selected bond lengths (Å) and angles (°) for **FR-R1**

|             |           |             |           |
|-------------|-----------|-------------|-----------|
| C10—C11     | 1.459(12) | C11—N5      | 1.385(10) |
| C11—O3      | 1.220(11) | C12—N5      | 1.413(10) |
| C12—N1      | 1.356(10) | C13—C14     | 1.488(11) |
| C12—S1      | 1.638(8)  | C13—O4      | 1.230(9)  |
| C13—N2      | 1.354(10) | C14—C19     | 1.386(11) |
| C14—C15     | 1.371(12) | C15—C16     | 1.379(12) |
| C16—C17     | 1.399(12) | C17—C18     | 1.386(12) |
| C18—C19     | 1.384(11) | C20—C21     | 1.497(10) |
| C19—C20     | 1.521(11) | C20—N2      | 1.525(8)  |
| C20—C32     | 1.503(10) | C21—C26     | 1.401(10) |
| C21—C22     | 1.386(10) | C22—O1      | 1.387(8)  |
| C22—C23     | 1.382(10) | C23—C24     | 1.392(10) |
| C24—C25     | 1.409(10) | C24—N3      | 1.376(10) |
| C25—C26     | 1.383(11) | C27—N3      | 1.457(10) |
| C29—N3      | 1.443(10) | C31—C32     | 1.380(11) |
| C31—O1      | 1.378(9)  | C31—C36     | 1.401(10) |
| C32—C33     | 1.396(11) | C33—C34     | 1.357(12) |
| C34—C35     | 1.405(12) | C35—C36     | 1.387(11) |
| C35—N4      | 1.362(10) | C39—N4      | 1.468(11) |
| C37—N4      | 1.425(14) | N1—N2       | 1.377(9)  |
| C9—C10—C11  | 130.9(7)  | O3—C11—N5   | 122.1(8)  |
| C11—C10—C6  | 121.5(8)  | N1—C12—N5   | 112.5(7)  |
| O3—C11—C10  | 121.4(8)  | N5—C12—S1   | 120.8(6)  |
| N5—C11—C10  | 116.4(7)  | O4—C13—C14  | 127.5(8)  |
| N1—C12—S1   | 126.7(6)  | C15—C14—C13 | 129.4(8)  |
| N2—C13—C14  | 106.2(6)  | C19—C14—C13 | 108.0(7)  |
| O4—C13—N2   | 126.3(8)  | C14—C15—C16 | 117.7(8)  |
| C15—C14—C19 | 122.4(8)  | C18—C17—C16 | 121.4(8)  |

|             |          |             |          |
|-------------|----------|-------------|----------|
| C15—C16—C17 | 120.4(8) | C18—C19—C14 | 120.3(8) |
| C19—C18—C17 | 117.5(8) | C19—C20—N2  | 97.9(6)  |
| C14—C19—C20 | 112.3(7) | C21—C20—C32 | 111.5(6) |
| C18—C19—C20 | 127.4(7) | C32—C20—C19 | 110.1(6) |
| C21—C20—C19 | 114.0(6) | C22—C21—C20 | 121.7(6) |
| C21—C20—N2  | 112.2(6) | C26—C21—C20 | 122.7(7) |
| C32—C20—N2  | 110.3(6) | C23—C22—C21 | 123.2(6) |
| C22—C21—C26 | 115.4(7) | C21—C22—O1  | 122.3(6) |
| C23—C22—O1  | 114.4(6) | N3—C24—C23  | 121.0(7) |
| C22—C23—C24 | 121.2(7) | C23—C24—C25 | 116.6(7) |
| N3—C24—C25  | 122.4(6) | C25—C26—C21 | 122.4(7) |
| C26—C25—C24 | 121.1(6) | C32—C31—C36 | 122.3(7) |
| O1—C31—C32  | 123.2(6) | O1—C31—C36  | 114.5(7) |
| C31—C32—C20 | 121.3(7) | C31—C32—C33 | 115.6(7) |
| C33—C32—C20 | 123.1(7) | C34—C33—C32 | 123.4(8) |
| C33—C34—C35 | 120.9(8) | C36—C35—C34 | 116.9(7) |
| N4—C35—C34  | 120.8(8) | N4—C35—C36  | 122.2(8) |
| C35—C36—C31 | 120.9(8) | C11—N5—C12  | 128.5(7) |
| C12—N1—N2   | 122.3(6) | C13—N2—N1   | 119.1(6) |
| C13—N2—C20  | 114.6(6) | C24—N3—C27  | 122.2(7) |
| N1—N2—C20   | 118.6(6) | C29—N3—C27  | 116.7(7) |
| C24—N3—C29  | 120.6(6) | C35—N4—C39  | 120.9(8) |
| C35—N4—C37  | 121.5(8) | C31—O1—C22  | 118.5(6) |
| C37—N4—C39  | 117.4(7) |             |          |

---

**Table S3.** Hydrogen bond geometry (Å, °) for **FR-R1**

| D–H···A                      | <i>d</i> (D–H) | <i>d</i> (H···A) | <i>d</i> (D···A) | ∠(D–H···A) |
|------------------------------|----------------|------------------|------------------|------------|
| N5–H5A···O4 <sup>i</sup>     | 0.86           | 2.29             | 3.132(2)         | 167.7      |
| C9–H9···O4 <sup>i</sup>      | 0.98           | 2.19             | 3.111(2)         | 155.6      |
| C25–H25···O3 <sup>ii</sup>   | 0.93           | 2.66             | 3.576(9)         | 170.9      |
| C28–H28A···Cg1 <sup>ii</sup> | 0.96           | 3.24             | 3.834(2)         | 121.6      |
| C37–H37···C29 <sup>iii</sup> | 0.93           | 2.71             | 3.591(16)        | 157.9      |
| C3–H3···Cg2 <sup>iv</sup>    | 0.98           | 2.69             | 3.644(2)         | 165.3      |
| C2–H2···C11 <sup>v</sup>     | 0.98           | 2.72             | 3.502(2)         | 137.4      |
| C41–H41···S <sup>v</sup>     | 0.98           | 2.81             | 3.653(12)        | 144.1      |
| C41–Cl2···Cg3 <sup>v</sup>   | 1.75           | 3.36             | 4.654(12)        | 128.5      |

Symmetry codes: (i) 0.5 - x, y, 0.5 + z; (ii) x, 1 + y, z; (iii) x, -1 + y, z; (iv) 0.5 - x, -1 + y, 0.5 + z; (v) 0.5 - x, -1 + y, -0.5 + z. Cg1 and Cg2 are the centroids of C6–C10 and C14–C19 rings, respectively; Cg3 is the centroid of C21–C22 bond.

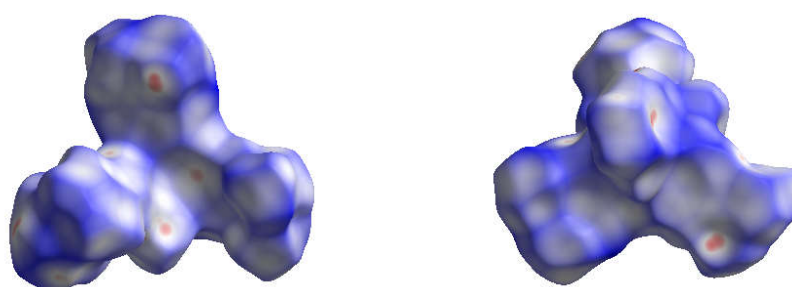**Fig. S5.** Hirshfeld surfaces of **FR-R1** in different orientations.



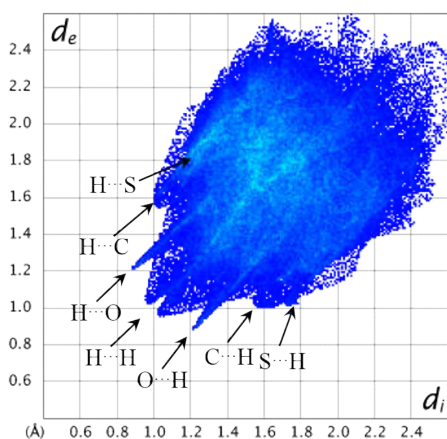

**Fig. S6.** Fingerprint plots of **FR-R1**.

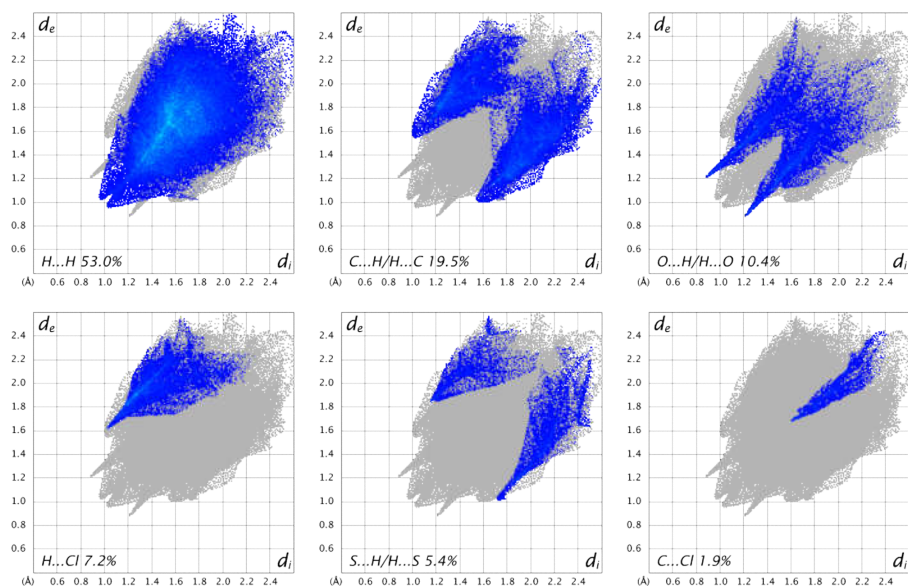

**Fig. S7.** Fingerprint plots of **FR-R1** resolved into the indicated intermolecular contacts.

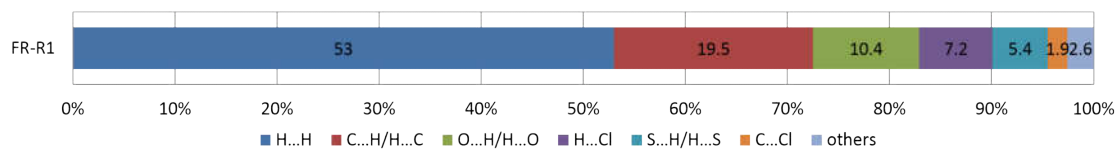

**Fig. S8.** Distribution (%) of intermolecular contacts from Hirshfeld surface analysis for **FR-R1**.

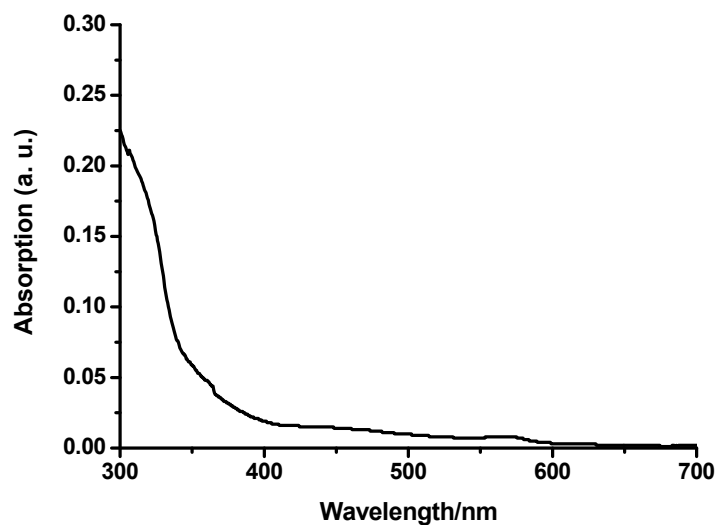

**Fig. S9.** UV-vis spectrum of **FR-R1** (10  $\mu$ M) in H<sub>2</sub>O/THF (4:1, v/v).

**Table S4.** UV-vis absorption of **FR-R1** (10  $\mu$ M) at 569 nm in different solvents

| Solvent | THF/H <sub>2</sub> O (4:1, v/v) | THF   | EtOAc | CH <sub>2</sub> Cl <sub>2</sub> | CHCl <sub>3</sub> | DMSO  | DMF   |
|---------|---------------------------------|-------|-------|---------------------------------|-------------------|-------|-------|
| Abs.    | 0.013                           | 0.011 | 0.006 | 0.008                           | 0.009             | 0.116 | 0.155 |

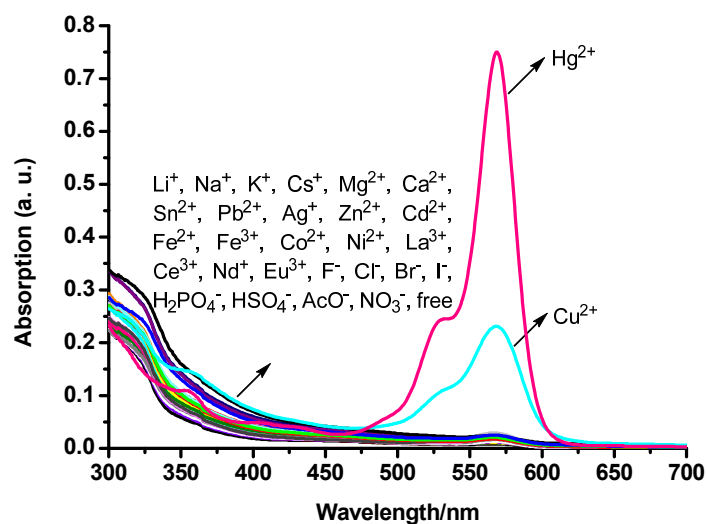

**Fig. S10.** UV-vis spectra of **FR-R1** (10  $\mu$ M) in H<sub>2</sub>O/THF (4:1, v/v) in the presence of various ions (50  $\mu$ M).

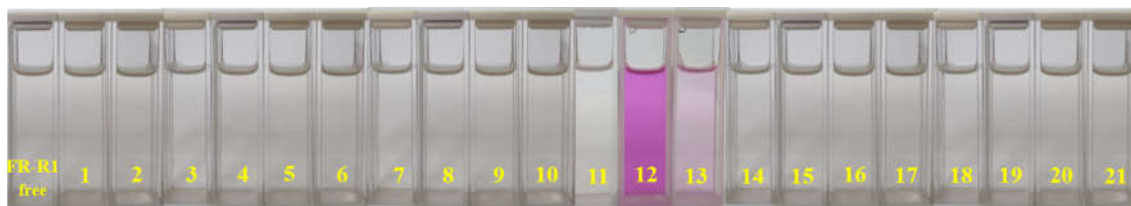

**Fig. S11.** Color changes of **FR-R1** (10  $\mu\text{M}$ ) in  $\text{H}_2\text{O}/\text{THF}$  (4:1, v/v) with different metal ions (50  $\mu\text{M}$ ) under visible light, where 1-21 are  $\text{Li}^+$ ,  $\text{Na}^+$ ,  $\text{K}^+$ ,  $\text{Cs}^+$ ,  $\text{Mg}^{2+}$ ,  $\text{Ca}^{2+}$ ,  $\text{Sn}^{2+}$ ,  $\text{Pb}^{2+}$ ,  $\text{Ag}^+$ ,  $\text{Zn}^{2+}$ ,  $\text{Cd}^{2+}$ ,  $\text{Hg}^{2+}$ ,  $\text{Cu}^{2+}$ ,  $\text{Fe}^{2+}$ ,  $\text{Fe}^{3+}$ ,  $\text{Co}^{2+}$ ,  $\text{Ni}^{2+}$ ,  $\text{La}^{3+}$ ,  $\text{Ce}^{3+}$ ,  $\text{Nd}^+$ , and  $\text{Eu}^{3+}$ , respectively.

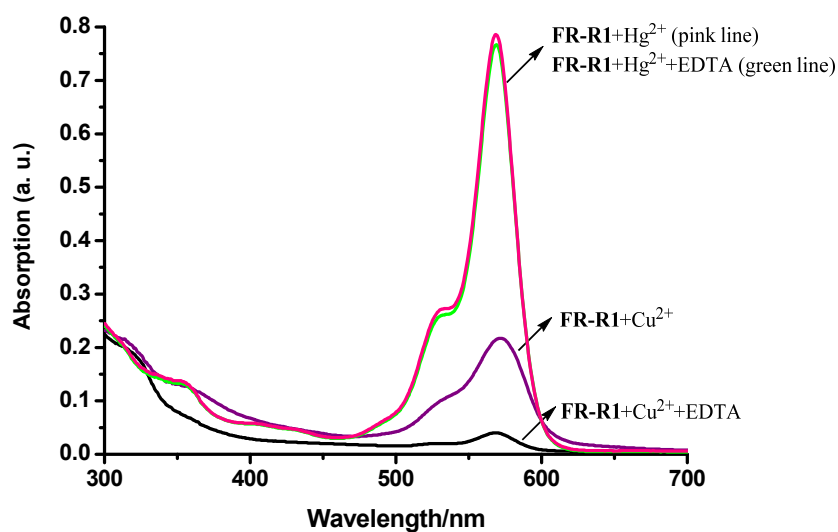

**Fig. S12.** Effects of EDTA (20  $\mu\text{M}$ ) on UV-vis spectra of **FR-R1** (10  $\mu\text{M}$ ) in  $\text{H}_2\text{O}/\text{THF}$  (4:1, v/v) with  $\text{Hg}^{2+}$  (10  $\mu\text{M}$ ) or  $\text{Cu}^{2+}$  (10  $\mu\text{M}$ ).

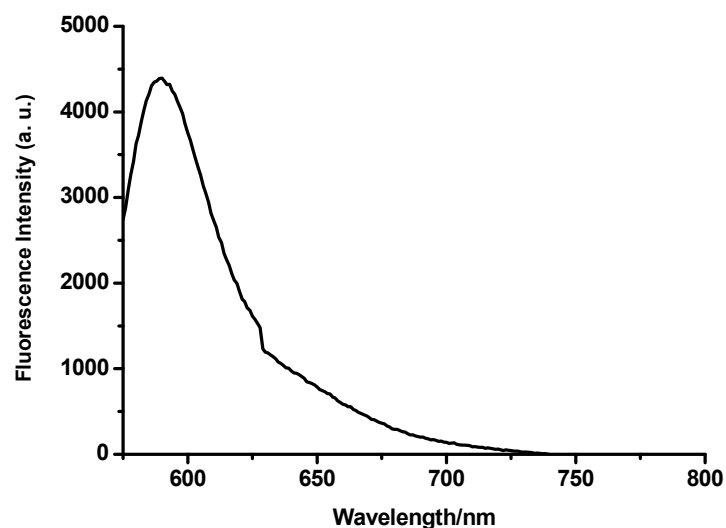

**Fig. S13.** Fluorescent spectrum of **FR-R1** (5  $\mu\text{M}$ ) in  $\text{H}_2\text{O}/\text{THF}$  (4:1, v/v). ( $\lambda_{\text{ex}} = 565 \text{ nm}$ ).

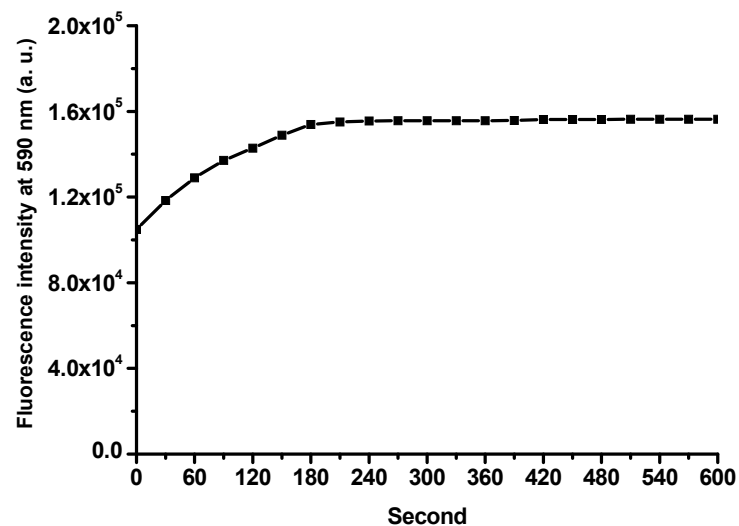

**Fig. S14.** Time response of **FR-R1** (5  $\mu\text{M}$ ) in  $\text{H}_2\text{O}/\text{THF}$  (4:1, v/v) to  $\text{Hg}^{2+}$  (10  $\mu\text{M}$ ).

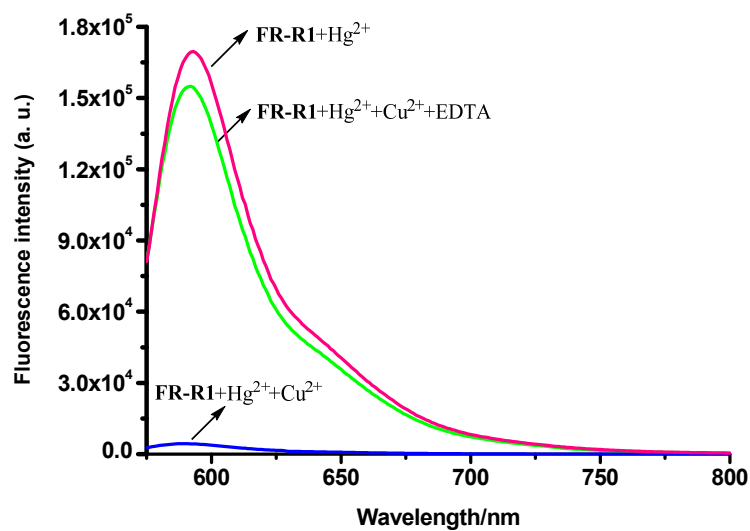

**Fig. S15.** Fluorescent spectra of **FR-R1** (5  $\mu\text{M}$ ) in  $\text{H}_2\text{O}/\text{THF}$  (4:1, v/v) with  $\text{Hg}^{2+}$  (5  $\mu\text{M}$ ) affected by  $\text{Cu}^{2+}$  (10  $\mu\text{M}$ ) or  $\text{Cu}^{2+}$  (10  $\mu\text{M}$ ) plus EDTA (20  $\mu\text{M}$ ). ( $\lambda_{\text{ex}} = 565 \text{ nm}$ ).

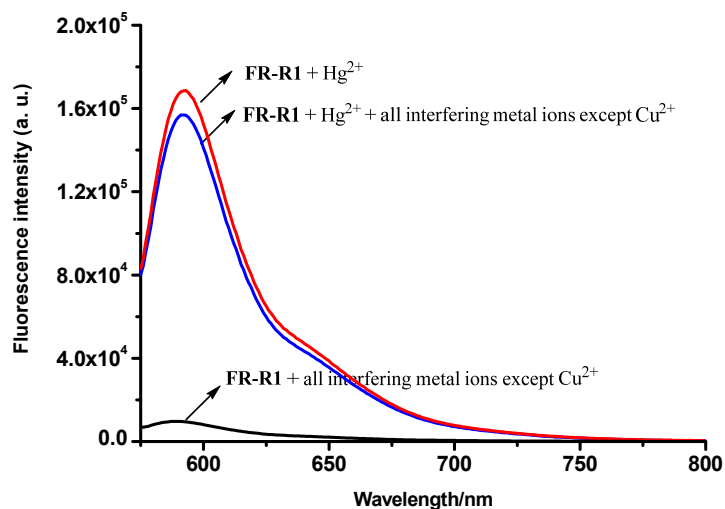

**Fig. S16.** Fluorescent spectra of **FR-R1** (5  $\mu\text{M}$ ) in  $\text{H}_2\text{O}/\text{THF}$  (4:1, v/v) with  $\text{Hg}^{2+}$  in the mixture of all interfering metal ions (except  $\text{Cu}^{2+}$ ) at the same concentration of 5  $\mu\text{M}$ . ( $\lambda_{\text{ex}} = 565 \text{ nm}$ ).

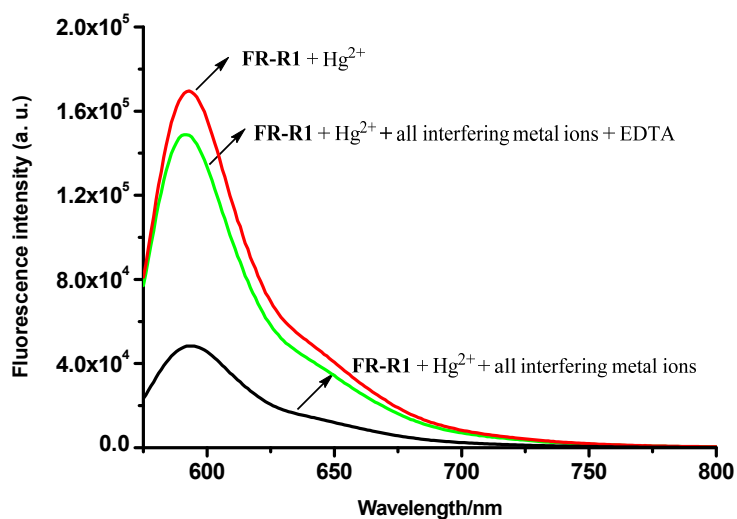

**Fig. S17.** Effects of EDTA (100  $\mu\text{M}$ ) on fluorescent spectra of **FR-R1** (5  $\mu\text{M}$ ) in  $\text{H}_2\text{O}/\text{THF}$  (4:1, v/v) with  $\text{Hg}^{2+}$  in the mixture of all interfering metal ions at the same concentration of 5  $\mu\text{M}$ . ( $\lambda_{\text{ex}} = 565 \text{ nm}$ ).

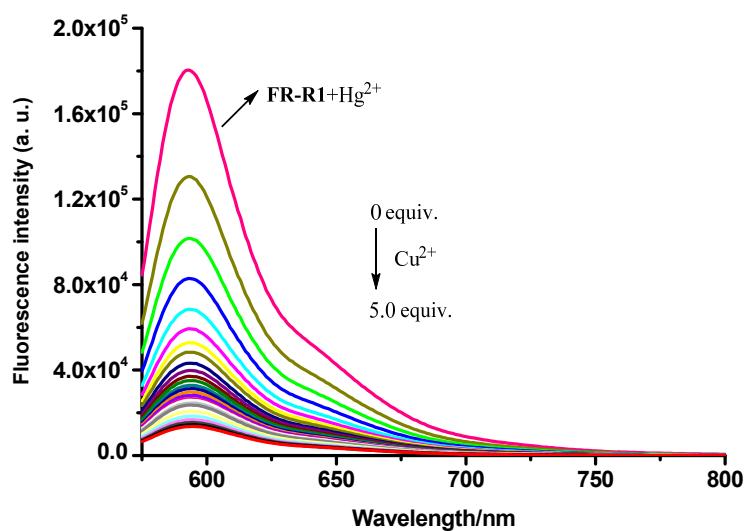

**Fig. S18.** Fluorescent spectra of **FR-R1** (5  $\mu\text{M}$ ) in  $\text{H}_2\text{O}/\text{THF}$  (4:1, v/v) with  $\text{Hg}^{2+}$  (5  $\mu\text{M}$ ) obtained during the titration of  $\text{Cu}^{2+}$  (0 to 5.0 equiv.). ( $\lambda_{\text{ex}} = 565 \text{ nm}$ ).

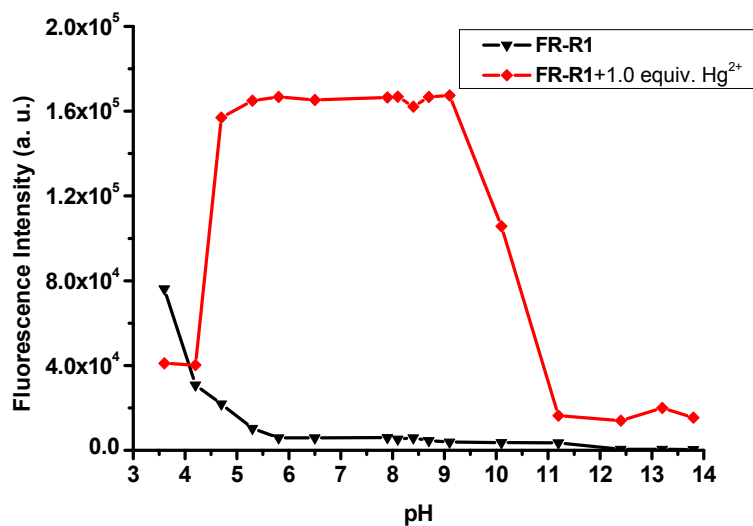

**Fig. S19.** Fluorescent intensity changes of **FR-R1** and  $[\text{FR-R1}+\text{Hg}^{2+}]$  in various pH values. pH was adjusted with 0.1 M HCl and 0.1 M NaOH aqueous solutions,  $\lambda_{\text{ex}} = 565 \text{ nm}$ ,  $\lambda_{\text{em}} = 590 \text{ nm}$ , 5  $\mu\text{M}$  for each sample in  $\text{H}_2\text{O}/\text{THF}$  (4:1, v/v) solution.

**Table S5.** CV data of **FR-R1** in the absence and presence of  $\text{Hg}^{2+}$  <sup>a</sup>

| Compd.                          | $E_{pa}/\text{mV}$ | $E_{pc}/\text{mV}$ | $E_{pa}-E_{pc}/\text{mV}$ | $E_{1/2}/\text{mV}$ | $I_{pa}/I_{pc}$ |
|---------------------------------|--------------------|--------------------|---------------------------|---------------------|-----------------|
| <b>FR-R1</b>                    | 768                | 661                | 107                       | 715                 | 1.92            |
| <b>FR-R1</b> + $\text{Hg}^{2+}$ | 701                | 614                | 87                        | 657                 | 1.07            |

<sup>a</sup> Conditions: **FR-R1** (0.5 mM) in  $\text{CH}_2\text{Cl}_2/\text{CH}_3\text{CN}$  (1:9, v/v) containing 0.1 M *n*- $\text{Bu}_4\text{NPF}_6$ , Pt disk working electrode, Pt auxiliary electrode,  $\text{Hg}/\text{Hg}_2\text{Cl}_2$  reference electrode, and scan rate at  $100 \text{ mVs}^{-1}$ .

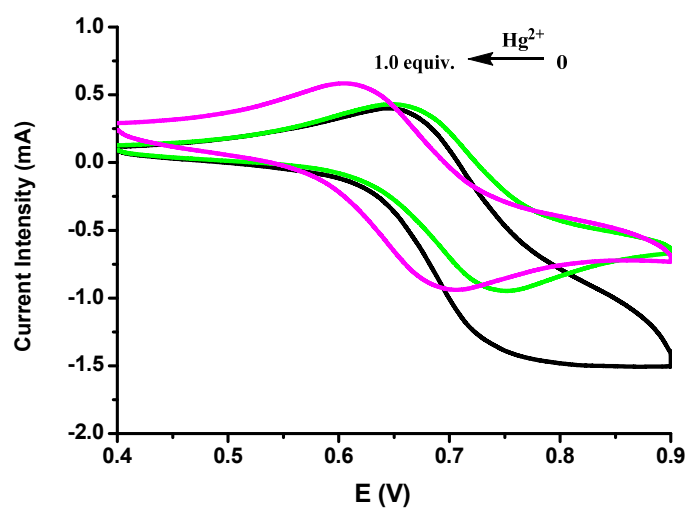

**Fig. S20.** CV assays of **FR-R1** (0.5 mM) in  $\text{CH}_2\text{Cl}_2/\text{MeCN}$  containing 0.1 M *n*- $\text{Bu}_4\text{NPF}_6$  as supporting electrolyte upon the addition of  $\text{Hg}^{2+}$  ions. Black, green and pink lines refer to **FR-R1**, **FR-R1** + 0.5 equiv.  $\text{Hg}^{2+}$  and **FR-R1** + 1.0 equiv.  $\text{Hg}^{2+}$ , respectively.

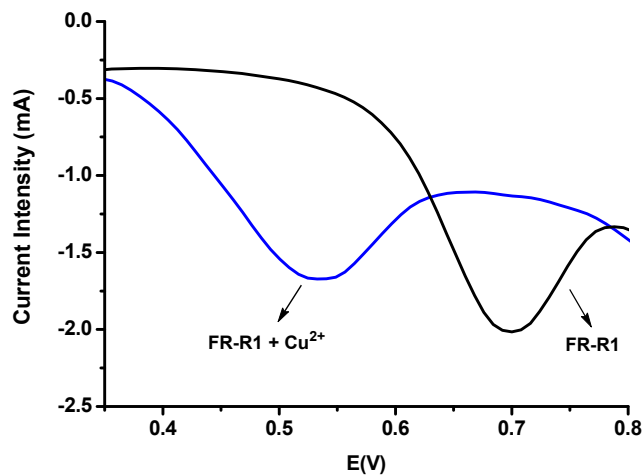

**Fig. S21.** DPV assays of **FR-R1** (0.5 mM) in H<sub>2</sub>O/THF (1:9, v/v) containing 0.1 M *n*-Bu<sub>4</sub>NClO<sub>4</sub> as supporting electrolyte upon the addition of Cu<sup>2+</sup> 1.0 equiv.

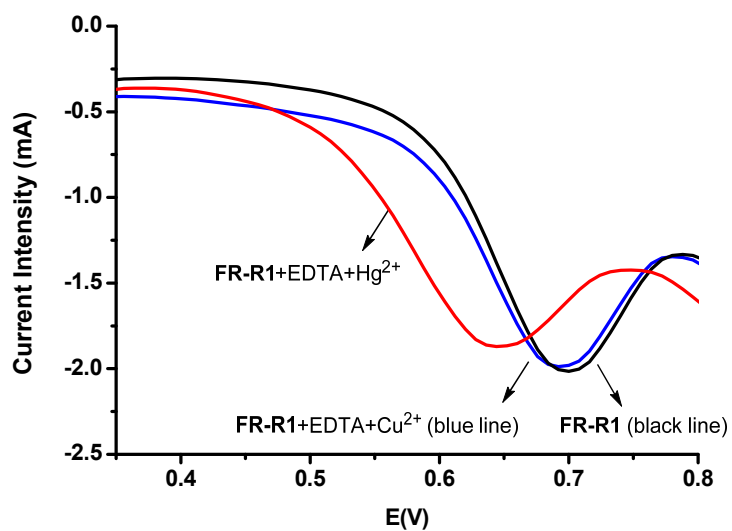

**Fig. S22.** DPV assays of **FR-R1** (0.5 mM) in H<sub>2</sub>O/THF to Hg<sup>2+</sup> (0.5 mM) and Cu<sup>2+</sup> (0.5 mM) in the presence of EDTA (1.0 mM) with 0.1 M *n*-Bu<sub>4</sub>NClO<sub>4</sub> as supporting electrolyte.



**Table S6.** Comparison of **FR-R1** with some analogs with different functional groups

| Probe                                                                               | Analysis medium               | Detection limit                   | Ref. |
|-------------------------------------------------------------------------------------|-------------------------------|-----------------------------------|------|
| 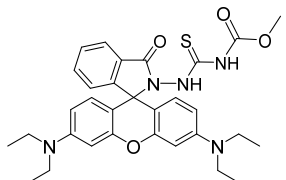   | MeCN/H <sub>2</sub> O = 1:1   | 9.97×10 <sup>-7</sup> M (0.2 ppm) | S1   |
|    | DMF/HEPES = 2:3               | 1.71×10 <sup>-9</sup> M           | S2   |
|   | MeOH/H <sub>2</sub> O = 2:1   | 3×10 <sup>-8</sup> M              | S3   |
|  | EtOH/H <sub>2</sub> O = 1:1   | 3.2×10 <sup>-9</sup> M            | S4   |
|  | MeCN/HEPES = 0.6:100          | 6.9×10 <sup>-9</sup> M            | S5   |
|  | MeCOMe/H <sub>2</sub> O = 2:3 | 5×10 <sup>-8</sup> M              | S6   |

|                                                                                     |                              |                                 |          |
|-------------------------------------------------------------------------------------|------------------------------|---------------------------------|----------|
| 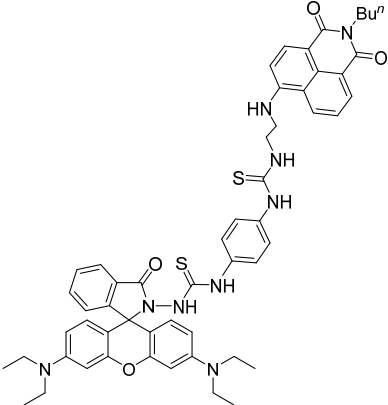   | MeOH/H <sub>2</sub> O = 1:2  | $1.68 \times 10^{-7}$ M         | S7       |
|   | Tris-HCl (0.01 M)/MeCN = 1:1 | $5.4 \times 10^{-9}$ M          | S8       |
|  | MeOH/H <sub>2</sub> O = 1:4  | $9.97 \times 10^{-9}$ M (2 ppb) | S9       |
|  | MeCN/HEPES = 1:1             | $4.87 \times 10^{-7}$ M         | S10      |
|  | THF/H <sub>2</sub> O = 1:9   | $1.60 \times 10^{-8}$ M         | Our work |

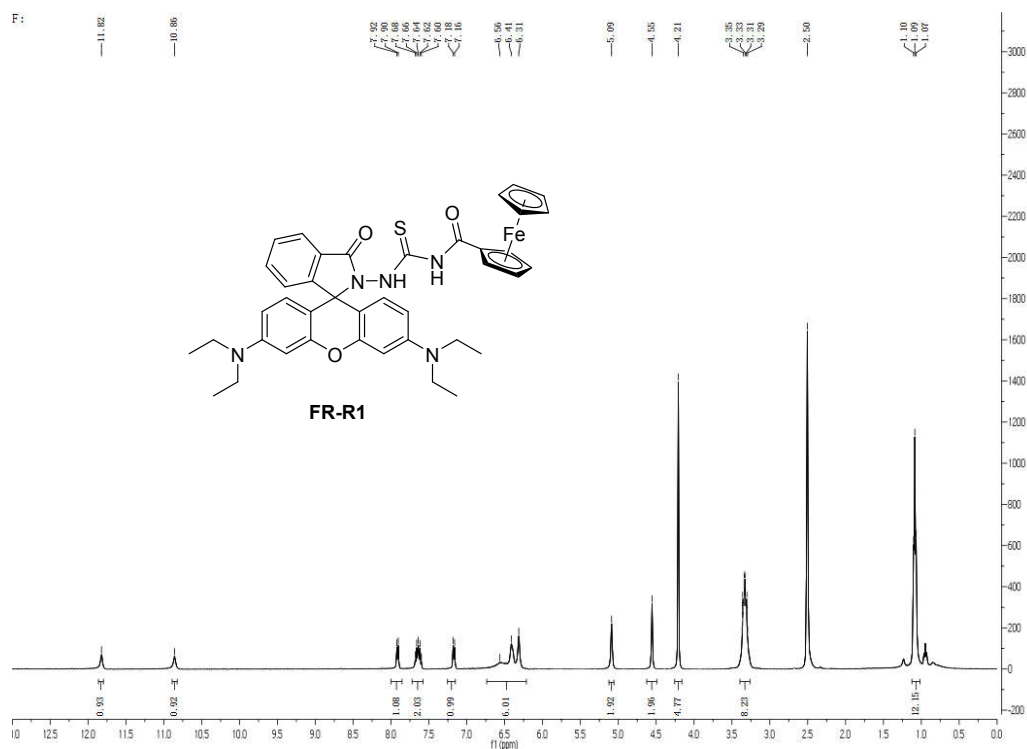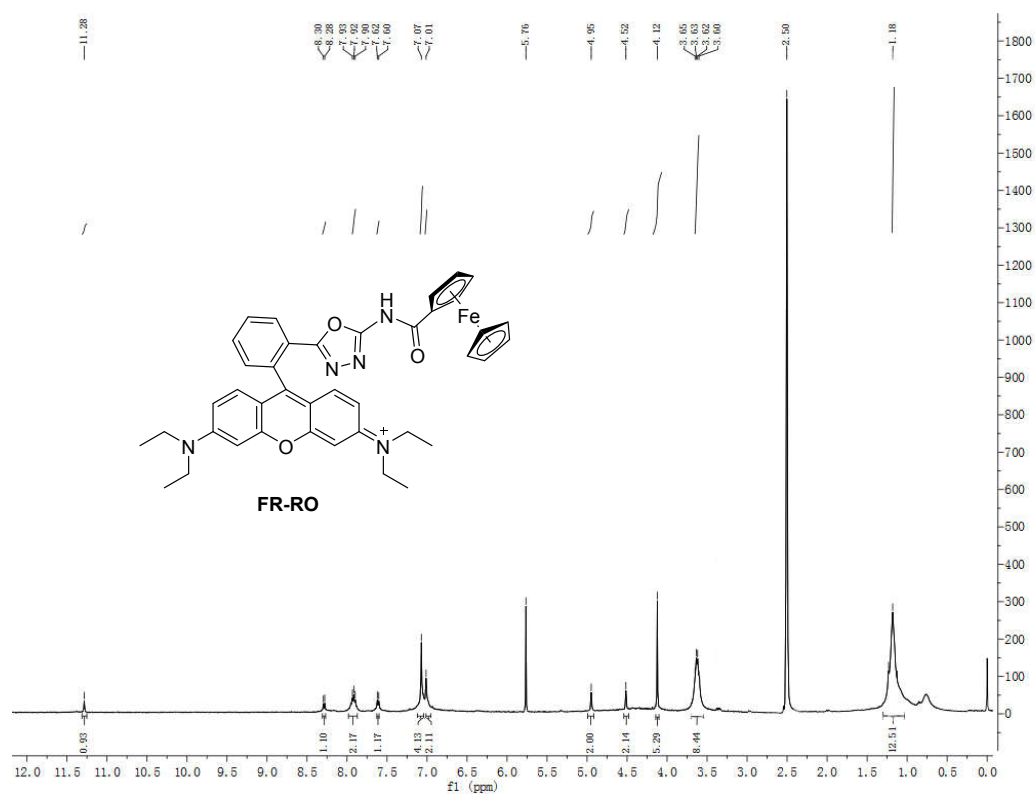

**Fig. S23.** <sup>1</sup>H NMR spectra of FR-R1 and FR-RO in DMSO-*d*<sub>6</sub>.  
S19

**Table S7.** Cartesian coordinates (Å) of the structures of **FR-R1** and **FR-RO**

| <b>FR-R1</b> |             |             |             |
|--------------|-------------|-------------|-------------|
| C            | 5.02422002  | -0.40393880 | 1.36476044  |
| H            | 3.97319432  | -0.37933464 | 1.62638336  |
| C            | 5.85515073  | 0.72657393  | 1.10106710  |
| H            | 5.53969346  | 1.76062397  | 1.11591903  |
| C            | 7.16213942  | 0.25124883  | 0.77384828  |
| H            | 8.01101577  | 0.86177607  | 0.49723887  |
| C            | 7.13835613  | -1.17508556 | 0.83038170  |
| H            | 7.96596204  | -1.83381840 | 0.60510799  |
| C            | 5.81716469  | -1.57824124 | 1.19418779  |
| H            | 5.46768657  | -2.59608062 | 1.29998107  |
| C            | 5.09510880  | 0.64941679  | -2.17879984 |
| H            | 4.82784067  | 1.69324784  | -2.10872660 |
| C            | 6.36443869  | 0.10450520  | -2.50764456 |
| H            | 7.25771460  | 0.67033538  | -2.73351837 |
| C            | 6.27366410  | -1.31993273 | -2.43964304 |
| H            | 7.08296117  | -2.01726538 | -2.60646453 |
| C            | 4.94633851  | -1.66543324 | -2.06203456 |
| H            | 4.58948439  | -2.67416413 | -1.90253776 |
| C            | 4.20166069  | -0.44062461 | -1.90598032 |
| C            | 2.84091583  | -0.23518747 | -1.37696363 |
| C            | 1.05556369  | -1.57588440 | -0.22669293 |
| C            | 0.34106204  | -0.30050415 | 2.53235712  |
| C            | -0.74545347 | 0.01062101  | 3.49308464  |
| C            | -0.68091593 | 0.08511620  | 4.88279954  |
| H            | 0.25410151  | -0.11566166 | 5.39643766  |
| C            | -1.84623732 | 0.41892072  | 5.57292658  |
| H            | -1.83588927 | 0.48345684  | 6.65698327  |
| C            | -3.03692304 | 0.67142605  | 4.87514022  |
| H            | -3.93501717 | 0.92921007  | 5.42951198  |
| C            | -3.08940225 | 0.59741577  | 3.48018892  |
| H            | -4.01421016 | 0.79388630  | 2.94620309  |
| C            | -1.92569736 | 0.26439914  | 2.79374522  |
| C            | -1.71229893 | 0.13831252  | 1.28282663  |
| C            | -2.64786081 | -0.86512987 | 0.63837424  |
| C            | -3.38146622 | -0.56511744 | -0.51058119 |
| C            | -4.22992644 | -1.48816413 | -1.12273776 |

|   |             |             |             |
|---|-------------|-------------|-------------|
| H | -4.74418454 | -1.15853484 | -2.01505337 |
| C | -4.39135229 | -2.78258549 | -0.59340309 |
| C | -3.63845385 | -3.09885435 | 0.56879853  |
| H | -3.69187556 | -4.08399074 | 1.01225589  |
| C | -2.80270267 | -2.16198939 | 1.15018038  |
| H | -2.22695235 | -2.44791245 | 2.02425520  |
| C | -5.36335493 | -5.06259946 | -0.65216305 |
| H | -6.32413491 | -5.46430634 | -0.99047211 |
| H | -5.42343200 | -5.02767562 | 0.44185611  |
| C | -4.23373629 | -6.01091829 | -1.08168506 |
| H | -3.25548691 | -5.62529127 | -0.78192180 |
| H | -4.22298152 | -6.14588611 | -2.16728631 |
| H | -4.36933278 | -6.99513844 | -0.61933420 |
| C | -6.00048021 | -3.36910657 | -2.38232138 |
| H | -6.39861222 | -2.35188094 | -2.28937860 |
| H | -6.87375110 | -4.02880033 | -2.42125715 |
| C | -5.20497854 | -3.49947035 | -3.69027343 |
| H | -4.89521781 | -4.53436941 | -3.86315885 |
| H | -4.30492967 | -2.87888616 | -3.67085542 |
| H | -5.81965357 | -3.18388769 | -4.54087309 |
| C | -2.57736964 | 1.66052385  | -0.57814155 |
| C | -1.81003937 | 1.48421811  | 0.57640045  |
| C | -1.10796753 | 2.61171340  | 1.02948056  |
| H | -0.50398063 | 2.52661929  | 1.92870958  |
| C | -1.15542624 | 3.83511383  | 0.38236714  |
| H | -0.58975316 | 4.65869499  | 0.79686311  |
| C | -1.92644560 | 4.00299884  | -0.79908090 |
| C | -2.64864299 | 2.88196813  | -1.24990912 |
| H | -3.28290297 | 2.91657912  | -2.12510000 |
| C | -2.75564406 | 5.36344304  | -2.69477765 |
| H | -2.63229375 | 4.46961357  | -3.31689944 |
| C | -4.24965604 | 5.63457129  | -2.46006746 |
| H | -4.40166418 | 6.58114270  | -1.93278675 |
| H | -4.70810176 | 4.84065568  | -1.86403700 |
| H | -4.77958012 | 5.69181578  | -3.41739831 |
| C | -1.26776947 | 6.38763179  | -0.95945220 |
| H | -1.11835478 | 7.07445544  | -1.79859357 |
| H | -0.26309420 | 6.10124741  | -0.62699339 |
| C | -2.00386768 | 7.12005046  | 0.17241387  |

|    |             |             |             |
|----|-------------|-------------|-------------|
| H  | -2.18606957 | 6.45600736  | 1.02189787  |
| H  | -2.97060467 | 7.50231472  | -0.16834047 |
| H  | -1.40795702 | 7.96918198  | 0.52520364  |
| Fe | 5.77969704  | -0.49029534 | -0.58284197 |
| N  | 0.45603588  | -0.41215761 | 0.14186495  |
| H  | 0.90605722  | 0.44882691  | -0.18890774 |
| N  | -0.28836806 | -0.34426132 | 1.29248882  |
| N  | -5.26113193 | -3.69967541 | -1.16796582 |
| N  | -1.95457796 | 5.20972358  | -1.48376177 |
| O  | -3.33241694 | 0.66057791  | -1.13179604 |
| O  | 2.38341245  | 0.88881802  | -1.16308277 |
| O  | 1.53166111  | -0.47355340 | 2.73761887  |
| N  | 2.12489388  | -1.39878293 | -1.11205233 |
| H  | 2.55171492  | -2.28181898 | -1.35432743 |
| S  | 0.65712168  | -3.12160502 | 0.25179622  |
| H  | -2.32297867 | 6.18917932  | -3.26923093 |

---

**FR-RO**

---

|   |             |             |             |
|---|-------------|-------------|-------------|
| C | -6.24539133 | -1.78346513 | -0.85083267 |
| H | -6.54040971 | -2.35506356 | 0.01810127  |
| C | -7.12522396 | -1.20100703 | -1.81237343 |
| H | -8.20515715 | -1.25043444 | -1.79645462 |
| C | -6.33381775 | -0.50338867 | -2.77270750 |
| H | -6.70878052 | 0.06517256  | -3.61239380 |
| C | -4.96172588 | -0.65365882 | -2.40700270 |
| H | -4.11617375 | -0.23378969 | -2.93478061 |
| C | -4.90878048 | -1.44634905 | -1.21948460 |
| H | -4.01501071 | -1.72343310 | -0.67673279 |
| C | -6.49047490 | 1.01474355  | 1.02014573  |
| H | -6.73214417 | 0.39999167  | 1.87475035  |
| C | -7.39364351 | 1.55647259  | 0.07010214  |
| H | -8.46506567 | 1.41348789  | 0.06363057  |
| C | -6.64366611 | 2.28185559  | -0.90577223 |
| H | -7.04955045 | 2.79264879  | -1.76767472 |
| C | -5.26546753 | 2.18730289  | -0.57304875 |
| H | -4.45827251 | 2.65929558  | -1.11710752 |

|   |             |             |             |
|---|-------------|-------------|-------------|
| C | -5.16247515 | 1.40334078  | 0.63513617  |
| C | -3.96337852 | 0.97191357  | 1.35642462  |
| C | -1.50952692 | 0.85258075  | 1.06692585  |
| C | 0.06338431  | 0.57171678  | 2.48102110  |
| C | 1.06489302  | 0.35721847  | 3.48938378  |
| C | 1.03544765  | 0.42507508  | 4.88273200  |
| H | 0.12330886  | 0.67465671  | 5.41408917  |
| C | 2.22381831  | 0.15744314  | 5.56183006  |
| H | 2.24331480  | 0.19822742  | 6.64568852  |
| C | 3.39237167  | -0.16295163 | 4.85768668  |
| H | 4.30498227  | -0.36669845 | 5.40898673  |
| C | 3.41087159  | -0.22716883 | 3.45810500  |
| H | 4.32190492  | -0.47648991 | 2.92426047  |
| C | 2.23800444  | 0.03309589  | 2.76622177  |
| C | 2.04158687  | 0.01298921  | 1.23668982  |
| C | 2.82370222  | 1.05741292  | 0.49641024  |
| C | 3.31978345  | 0.80087149  | -0.78888005 |
| C | 3.99316455  | 1.76408359  | -1.53262050 |
| H | 4.34027164  | 1.46772357  | -2.51241378 |
| C | 4.21684473  | 3.05926891  | -1.01512953 |
| C | 3.69952744  | 3.32822859  | 0.28689540  |
| H | 3.82047077  | 4.30403595  | 0.73645867  |
| C | 3.03562904  | 2.35243144  | 1.00306562  |
| H | 2.66638503  | 2.60131510  | 1.99419432  |
| C | 5.14317473  | 5.35015016  | -1.17679292 |
| H | 6.02832853  | 5.75501060  | -1.67548076 |
| H | 5.41145550  | 5.26662813  | -0.11809393 |
| C | 3.96820176  | 6.32108172  | -1.35224539 |
| H | 3.05871658  | 5.94034366  | -0.87853898 |
| H | 3.75020801  | 6.49073753  | -2.41036216 |
| H | 4.20928382  | 7.28787569  | -0.89820149 |
| C | 5.41617571  | 3.72541606  | -3.07217597 |
| H | 5.86500083  | 2.72581499  | -3.08515478 |
| H | 6.23603939  | 4.42277416  | -3.26515213 |
| C | 4.36539211  | 3.84929893  | -4.18353079 |
| H | 3.97866659  | 4.87011542  | -4.24960546 |
| H | 3.51870724  | 3.17861869  | -4.01229591 |
| H | 4.81109803  | 3.59367192  | -5.15039618 |
| C | 2.70511217  | -1.48071952 | -0.68330173 |

|    |             |             |             |
|----|-------------|-------------|-------------|
| C  | 2.18356829  | -1.34331257 | 0.61038110  |
| C  | 1.75266964  | -2.52453061 | 1.24095211  |
| H  | 1.35304528  | -2.47238844 | 2.24996405  |
| C  | 1.82580354  | -3.75975641 | 0.62868186  |
| H  | 1.49030455  | -4.62751350 | 1.17955912  |
| C  | 2.33660410  | -3.89336804 | -0.69663807 |
| C  | 2.79239013  | -2.71236608 | -1.32347708 |
| H  | 3.23638844  | -2.71835358 | -2.30894619 |
| C  | 2.90882598  | -5.23226008 | -2.69477818 |
| H  | 2.53729394  | -4.39390730 | -3.29416854 |
| C  | 4.43855085  | -5.31363201 | -2.78628594 |
| H  | 4.81884171  | -6.20578680 | -2.28106844 |
| H  | 4.91536183  | -4.44076769 | -2.33152840 |
| H  | 4.74875502  | -5.36300906 | -3.83519934 |
| C  | 1.96752702  | -6.34082966 | -0.64662438 |
| H  | 1.72799317  | -7.07508188 | -1.42066020 |
| H  | 1.02943224  | -6.15659126 | -0.11111398 |
| C  | 3.01696775  | -6.92646753 | 0.30732298  |
| H  | 3.29740426  | -6.20985305 | 1.08447930  |
| H  | 3.92520842  | -7.21073070 | -0.23096330 |
| H  | 2.62021159  | -7.82180162 | 0.79706450  |
| Fe | -6.01361963 | 0.28480750  | -0.87562550 |
| N  | -0.46397220 | 0.56654533  | 0.33109986  |
| N  | 0.51970155  | 0.41300347  | 1.26722186  |
| N  | 4.92025516  | 4.00694886  | -1.72125374 |
| N  | 2.37609238  | -5.11130089 | -1.33404360 |
| O  | 3.18625473  | -0.41746274 | -1.40074642 |
| O  | -3.93741609 | 0.48034338  | 2.46471327  |
| O  | -1.23885263 | 0.86905613  | 2.42621768  |
| N  | -2.74400229 | 1.18150624  | 0.62390529  |
| H  | -2.80641199 | 1.29516104  | -0.38064777 |
| H  | 2.46776743  | -6.13158583 | -3.13428176 |

---



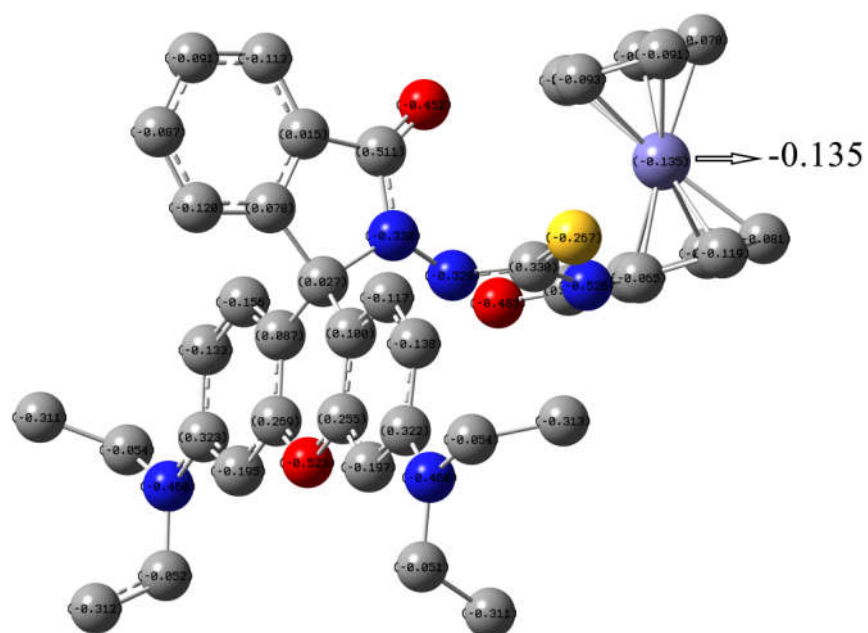

FR-R1

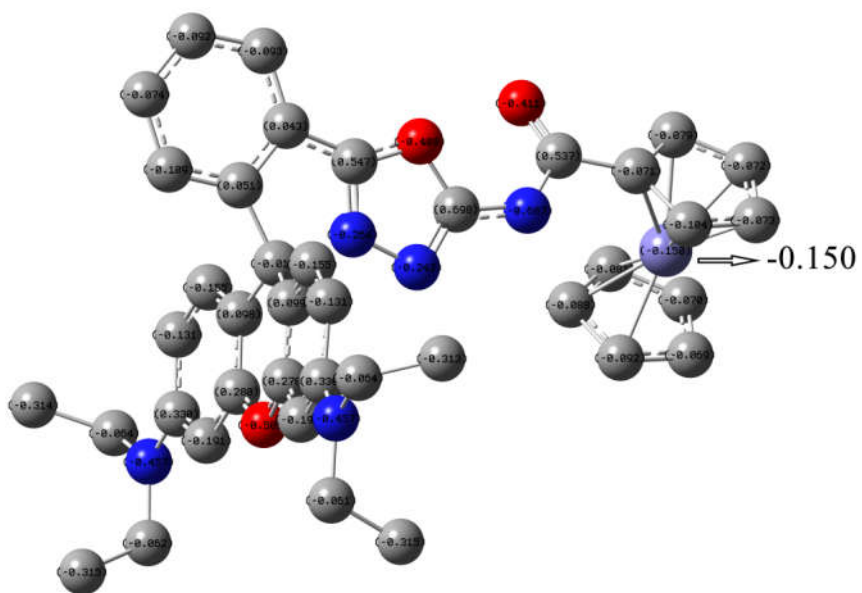

FR-RO

Fig. S24. The Mulliken charge values in FR-R1 and FR-RO.

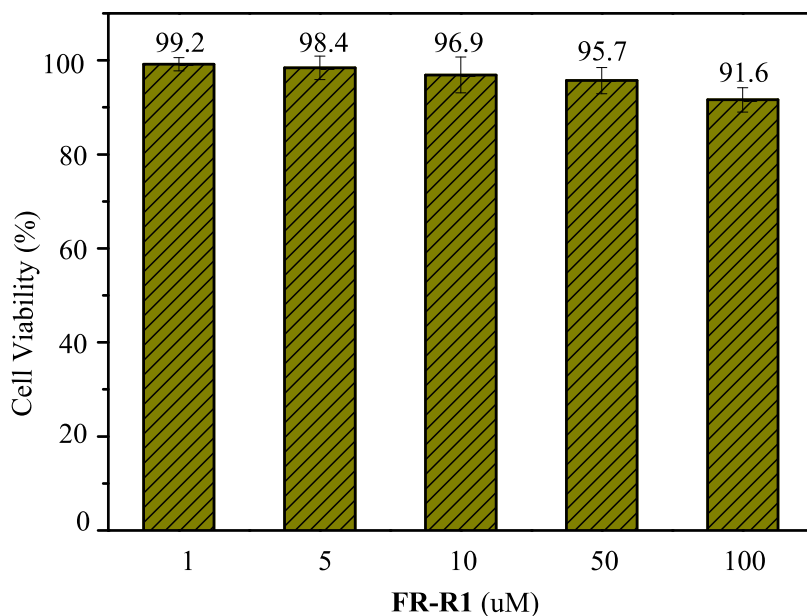

**Fig. S25.** The cytotoxicity of **FR-R1** on HeLa cells. The data are given as mean  $\pm$  SD (n = 6).

#### References:

- S1. Y. Tao, L. Duan, Q. Li, T. Xu and H. Zhang, *Sensor Lett.*, 2014, **12**, 1776–1780.
- S2. W.-Y. Liu, S.-L. Shen, H.-Y. Li, J.-Y. Miao and B.-X. Zhao, *Anal. Chim. Acta*, 2013, **791**, 65–71.
- S3. Y. Liu, X. Lv, Y. Zhao, M. Chen, J. Liu, P. Wang and W. Guo, *Dyes Pigments*, 2012, **92**, 909–915.
- S4. M. Wang, J. Wen, Z. Qin and H. Wang, *Dyes Pigments*, 2015, **120**, 208–212.
- S5. Z. Chen, J. Chen, D. Pan, H. Li, Y. Yao, Z. Lyu, L. Yang and L.-J. Ma, *Anal. Bioanal. Chem.*, 2017, **409**, 2429–2435.
- S6. G.-Q. Shang, X. Gao, M.-X. Chen, H. Zheng and J.-G. Xu, *J. Fluoresc.*, 2008, **18**, 1187–1192.
- S7. C. Wang, D. Zhang, X. Huang, P. Ding, Z. Wang, Y. Zhao and Y. Ye, *Sensor. Actuat. B-Chem.*, 2014, **198**, 33–40.
- S8. N. R. Chereddy, P. Nagaraju, M.V. N. Raju, K. Saranraj, S. Thennarasu and V. J. Rao, *Dyes Pigments*, 2015, **112**, 201–209.
- S9. Y.-K. Yang, K.-J. Yook, and J. Tae, *J. Am. Chem. Soc.*, 2005, **127**, 16760–16761.
- S10. J. F. Zhang, C. S. Lim, B. R. Cho and J. S. Kim, *Talanta*, 2010, **83**, 658–662.
